# Supplementary material
Source: PubMed Central journal article supplement (PMC2815904)

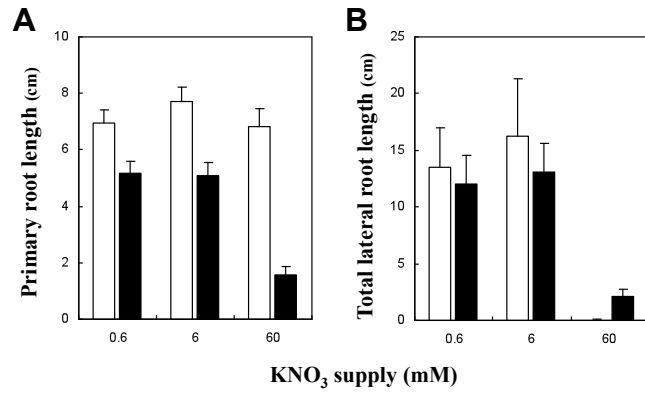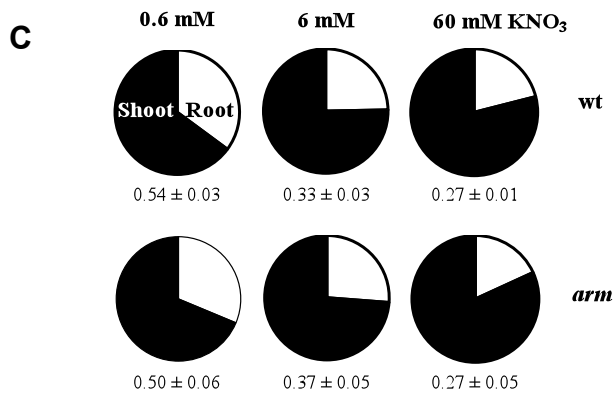

Supplement: pp.109.149849_1.pdf [file pp.109.149849_1.pdf]

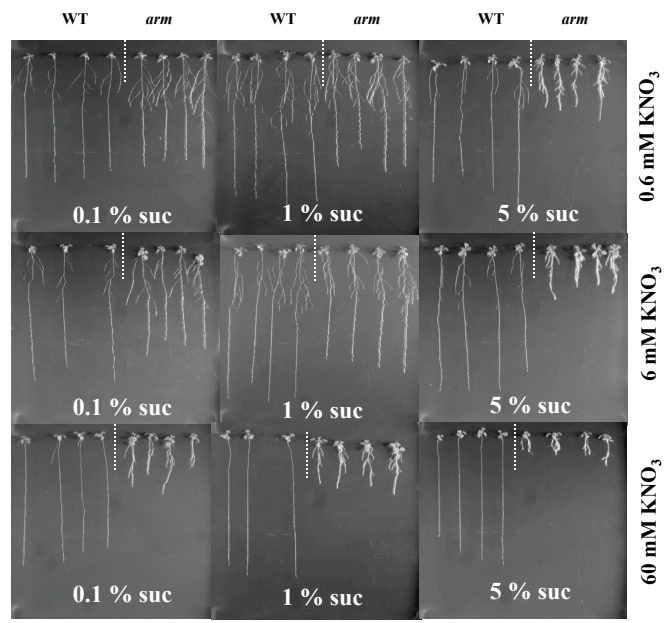

Supplement: pp.109.149849_2.pdf [file pp.109.149849_2.pdf]

**Chromosome 1**

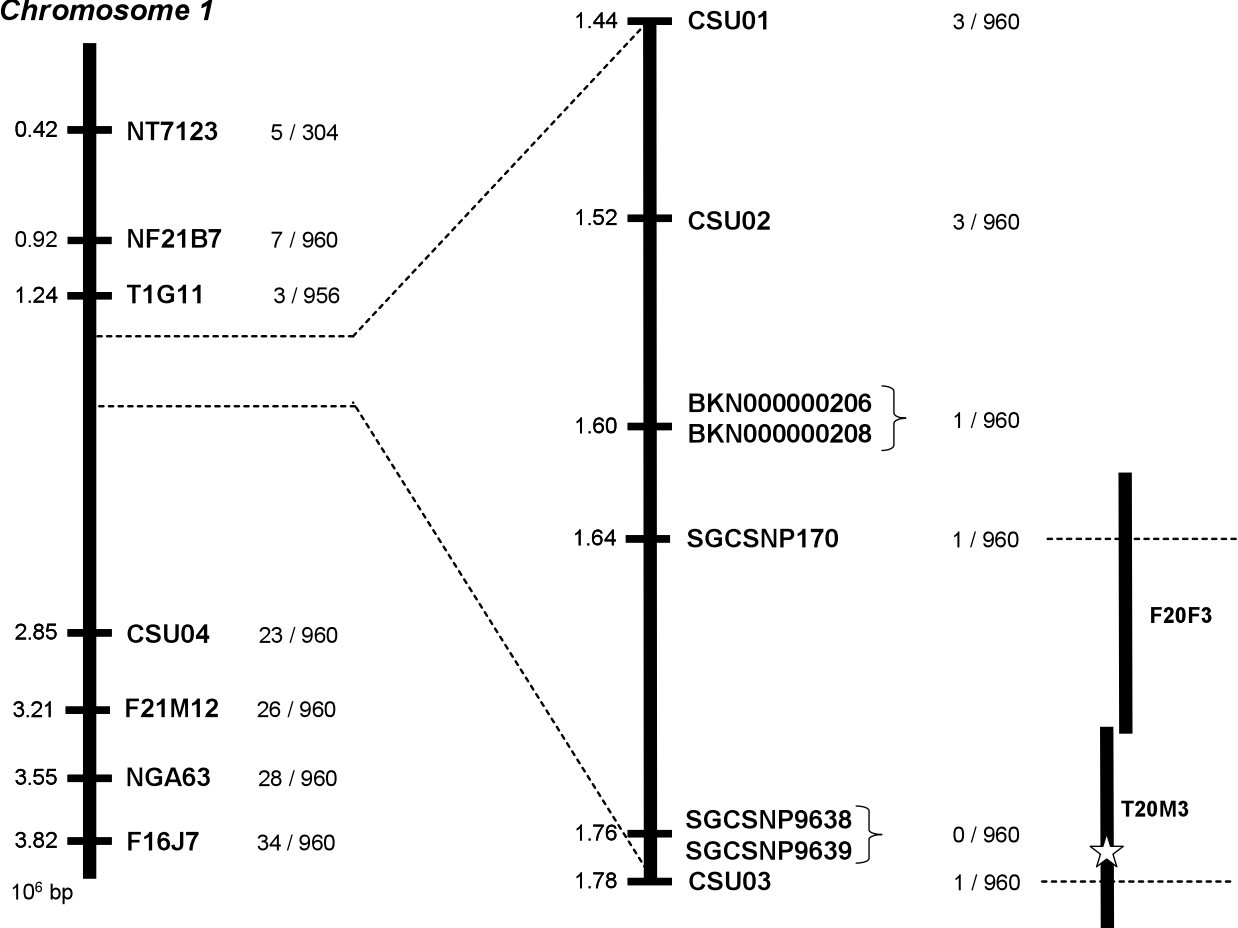

Supplement: pp.109.149849_3.pdf [file pp.109.149849_3.pdf]

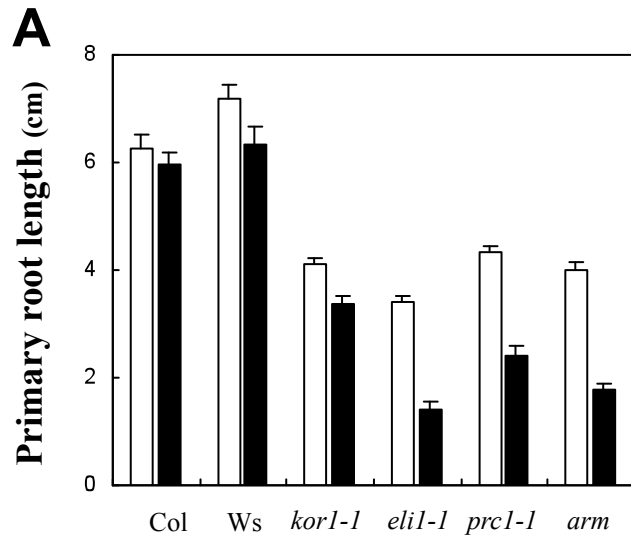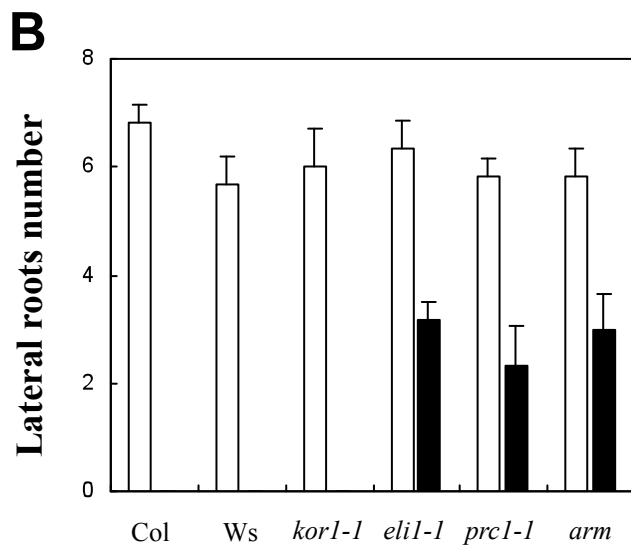

Supplement: pp.109.149849_4.pdf [file pp.109.149849_4.pdf]
